## RESEARCH ARTICLE

# Efficacy of short-course treatment for prevention of congenital transmission of Chagas disease: A retrospective cohort study

Guillermo Moscatelli<sup>1,2\*</sup>, Samanta Moroni<sup>1,2</sup>, Juan Carlos Ramírez<sup>2</sup>, Belén Warszatska<sup>1</sup>, Lascano Fernanda<sup>1</sup>, Nicolás González<sup>1</sup>, Andrés Rabinovich<sup>2</sup>, Jaime Altcheh<sup>1,2</sup>

**1** Servicio de Parasitología y Chagas, Hospital de Niños “Ricardo Gutiérrez”, Buenos Aires, Argentina,

**2** Instituto Multidisciplinario de Investigaciones en Patologías Pediátricas (IMIPP)- CONICET-GCBA, Buenos Aires, Argentina

\* [gmoscatelli@yahoo.com.ar](mailto:gmoscatelli@yahoo.com.ar)

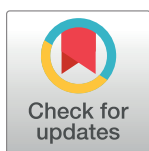

## Abstract

### Background

In regions with controlled vector transmission of *T. cruzi*, congenital transmission is the most frequent route of infection. Treatment with benznidazole (BZ) or nifurtimox (NF) for 60 days in girls and women of childbearing age showed to be effective in preventing mother to child transmission of this disease. Reports on short-course treatment ( $\leq 30$  days) are scarce.

### Methods

Retrospective cohort study. Offspring of women with Chagas disease who received short-course treatment ( $\leq 30$  days) with BZ or NF, attended between 2003 and 2022, were evaluated. Parasitemia (microhaematocrit and/or PCR) was performed at  $< 8$  months of age, and serology (ELISA and IHA) at  $\geq 8$  months to rule out congenital infection.

### Results

A total of 27 women receiving  $\leq 30$  days of treatment and their children were included in this study. NF was prescribed in 17/27 (63%) women, and BZ in 10/27 (37%). The mean duration of treatment was 29.2 days. None of the women experienced serious adverse events during treatment, and no laboratory abnormalities were observed. Forty infants born to these 27 treated women were included. All newborns were full term, with appropriate weight for their gestational age. No perinatal infectious diseases or complications were observed.

### Discussion

Several studies have shown that treatment of infected girls and women of childbearing age for 60 days is an effective practice to prevent transplacental transmission of *T. cruzi*. Our study demonstrated that short-duration treatment ( $\leq 30$  days) is effective and beneficial in preventing transplacental transmission of Chagas disease.

## OPEN ACCESS

**Citation:** Moscatelli G, Moroni S, Ramírez JC, Warszatska B, Fernanda L, González N, et al. (2024) Efficacy of short-course treatment for prevention of congenital transmission of Chagas disease: A retrospective cohort study. PLoS Negl Trop Dis 18(1): e0011895. <https://doi.org/10.1371/journal.pntd.0011895>

**Editor:** Richard Reithinger, RTI International, UNITED STATES

**Received:** September 20, 2023

**Accepted:** January 2, 2024

**Published:** January 22, 2024

**Peer Review History:** PLOS recognizes the benefits of transparency in the peer review process; therefore, we enable the publication of all of the content of peer review and author responses alongside final, published articles. The editorial history of this article is available here: <https://doi.org/10.1371/journal.pntd.0011895>

**Copyright:** © 2024 Moscatelli et al. This is an open access article distributed under the terms of the [Creative Commons Attribution License](https://creativecommons.org/licenses/by/4.0/), which permits unrestricted use, distribution, and reproduction in any medium, provided the original author and source are credited.

**Data Availability Statement:** All data are in the manuscript and/or supporting information files.

**Funding:** The author(s) received no specific funding for this work.

**Competing interests:** The authors have declared that no competing interests exist.

## Author summary

Reports on short-term treatment ( $\leq 30$  days) with benznidazole or nifurtimox for Chagas disease in girls and women of childbearing age are scarce. Numerous studies have previously shown that treatment of infected girls and women of childbearing age for 60 days is an effective strategy to prevent transplacental transmission of *T. cruzi*. However, our study provides convincing evidence that a shorter duration of treatment ( $\leq 30$  days) is not only effective but also beneficial in preventing transplacental transmission of Chagas disease. Our research demonstrated unequivocally that there was no congenital infection in the offspring of the 27 women who received a 30-day treatment regimen. This was confirmed by direct testing at birth and serological confirmation after 8 months of life.

## Introduction

Chagas disease, caused by the zoonotic parasite *Trypanosoma cruzi* (*T. cruzi*), is endemic to the Americas. In areas where vector transmission is under control, congenital transmission represents the main route of infection [1]. The prevalence of Chagas disease among pregnant women in Latin America varies from 5% to 40%, depending on the geographical location. It is estimated that approximately 2 million women of reproductive age in the Americas are infected with *T. cruzi*, and 3 to 10% of them will transmit the infection to their fetuses through the transplacental route, resulting in an annual birth of 9000 infected infants [2]. Only three countries (Argentina, Chile, and Uruguay) have implemented national policies to screen all pregnant women for *T. cruzi* infection [2].

Previous studies have demonstrated the efficacy in the prevention of transplacental transmission through a 60-day treatment regimen with benznidazole (BZ) or nifurtimox (NF) in girls and women of childbearing age, both during the acute and chronic phases [3–6].

However, currently, the administration of treatment during pregnancy is not recommended due to the lack of comprehensive fetal safety data regarding available drugs [7].

Building upon the proven efficacy of treatment in women of childbearing age for preventing congenital Chagas (CHC), as well as the effectiveness of treatment in infants, the ETMI Plus initiative (Elimination of mother-to-child transmission-plus) [8] proposes the following strategic actions to eliminate mother-to-child transmission: achieving a screening coverage of  $\geq 90\%$  for pregnant women, attaining a screening coverage of  $\geq 90\%$  for newborns born to seropositive mothers, and ensuring a treatment coverage of  $\geq 90\%$  for seropositive mothers. Infected children should receive treatment following confirmation of their infection.

Recent studies have suggested that shorter treatment durations, lasting fewer than 30 days, might also be effective in the treatment of Chagas disease. However, there is limited evidence regarding the effectiveness of short-duration treatments ( $\leq 30$  days) in women of childbearing age for preventing CHC. Therefore, it is crucial to evaluate whether such abbreviated treatment regimens can effectively prevent transplacental transmission of *T. cruzi*.

## Objective

To describe the efficacy of short ( $\leq 30$  days) treatment with BZ or NF in a cohort of girls and women of childbearing age for the prevention of mother-to-child transmission of Chagas disease.

## Materials and methods

### Ethics statement

The Research Committee and the Ethics Review Committee of “Ricardo Gutiérrez” Children’s Hospital, Buenos Aires, Argentina approved the study. The reference number of the study is CEI 16.29. Written informed consent and/or permission from the participant and/or legally authorized parent(s) or representative(s) was obtained prior to selection for this study in accordance with the participant’s age and local country regulations.

### Study design

Retrospective cohort study.

### Population

Children of women with Chagas disease who received short-term treatment, attended between 2003 and 2022, at the Parasitology and Chagas Service of “Ricardo Gutiérrez” Children’s Hospital in Buenos Aires.

### Inclusion criteria

Children of mothers who received treatment with BZ or NF for less than or equal 30 days. Residing in Buenos Aires city, an area without vector transmission. Not having visited endemic areas after treatment.

The following data were collected from maternal medical records: demography, treatment received, *T. cruzi* serology (before treatment and every six months thereafter for a minimum of 3 years), parasitological studies (real-time polymerase chain reaction—*T. cruzi* qPCR -) before and at the end of treatment, clinical course, and laboratory tests.

The serological techniques used were indirect hemagglutination (IHA) (Chagatest IHA, Wiener Laboratory, Argentina) and lysate ELISA (ELISA, Wiener Laboratory, Argentina). IHA titers  $\geq 1/16$  and ELISA R  $\geq 1.1$  (R: OD sample/OD cut-off) were considered positive.

### *T. cruzi* qPCR studies

Samples from peripheral blood mixed with an equal volume of 6M guanidine hydrochloride EDTA 0.2M buffer, pH 8.00. DNA was obtained using the High Pure PCR Template Preparation kit (Roche Diagnostics Corp., Indianapolis, IN). A duplex real-time PCR (qPCR) assay targeting *T. cruzi* satellite DNA and human RNase P gene was performed with 5  $\mu$ L of DNA extract in a final volume of 20  $\mu$ L, using the FastStart Universal Probe Master Mix (Roche Diagnostics GmbH Corp., Mannheim, Germany) and the TaqMan RNase P Control Reagents Kit (Applied Biosystems, Foster City, CA), as previously described [9].

Children born to these treated women underwent evaluation to rule out congenital infection: parasitemia by direct parasitological method (microhematocrit) and/or PCR in those younger than 8 months, and *T. cruzi* serology in those older than 8 months. Children were considered infected (CHC) when parasitaemia was positive or when serology was positive after 8 months of age.

### Statistical analysis

Continuous variables are presented as means with CI95% or medians and interquartile range, and categorical variables as percentages. The disappearance kinetics of serum antibodies were analyzed using survival analysis. Significance levels for analysis were 0.05. Analyses were

performed with R software v3.0 (R Core Team 2018. R Foundation for Statistical Computing, Vienna, Austria. <https://www.R-project.org/>).

## Results

Maternal data (Table 1): Out of a cohort of 592 women treated in our service, 51 attended the consultation with their children, of whom 24 (47%) received 60 days of BZ or NF treatment and 27 (53%) received 30 days or less of treatment. The latter were included in the analysis together with their children (Fig 1).

Mean age at treatment onset was 27.2 years (range 6 to 42 years). Place of birth: 16 (59.2%) in Bolivia, 9 (33.3%) in Argentina, and 2 (7.5%) in Paraguay. Before treatment, 21 (77.8%) lived in an endemic area. The route of infection was vectorial in 4 patients (14.8%), congenital in 4 (14.8%), and indeterminate in 19 patients (70.4%).

**Table 1. Maternal treatment, diagnosis and follow up. Infant's outcomes.**

| Subject Mother | Days of treatment | Treatment | Age at treatment (years) | Parasitaemia      |                      | Serology                |                                  |                   |                            | No. of children assessed | Congenital infection |
|----------------|-------------------|-----------|--------------------------|-------------------|----------------------|-------------------------|----------------------------------|-------------------|----------------------------|--------------------------|----------------------|
|                |                   |           |                          | PCR pre treatment | PCR end of treatment | ELISA pre treatment (R) | ELISA at 36 months follow-up (R) | HAI pre treatment | HAI at 36 months follow-up |                          |                      |
| 1              | 19                | BZ        | 21                       | Positive          | Negative             | 12                      | 5.1                              | 512               | 256                        | 3                        | NO                   |
| 2              | 22                | BZ        | 20                       | Positive          | Negative             | 12.4                    | 3.9                              | 1024              | 64                         | 3                        | NO                   |
| 3              | 30                | BZ        | 6                        | Negative          | Negative             | 2.37                    | Neg                              | 128               | Neg                        | 1                        | NO                   |
| 4              | 30                | BZ        | 9                        | Positive          | Negative             | 3.5                     | Neg                              | 256               | Neg                        | 1                        | NO                   |
| 5              | 30                | NF        | 14                       | Negative          | Negative             | 7                       | 2.7                              | 2048              | 128                        | 2                        | NO                   |
| 6              | 30                | BZ        | 20                       | Positive          | Negative             | 12.5                    | 3.8                              | 4096              | 128                        | 2                        | NO                   |
| 7              | 30                | NF        | 20                       | Positive          | Negative             | 10.6                    | 3.9                              | 128               | 32                         | 1                        | NO                   |
| 8              | 30                | NF        | 23                       | ND                | ND                   | 9.1                     | 7.3                              | 1024              | 256                        | 1*                       | NO                   |
| 9              | 30                | NF        | 25                       | Negative          | Negative             | 9                       | 4.1                              | 2048              | 64                         | 1                        | NO                   |
| 10             | 30                | NF        | 26                       | ND                | ND                   | 3.1                     | 4.1                              | 1024              | 256                        | 1                        | NO                   |
| 11             | 30                | NF        | 27                       | Positive          | Negative             | 5.8                     | 4.8                              | 2048              | 256                        | 1*                       | NO                   |
| 12             | 30                | NF        | 27                       | Positive          | Negative             | 6.8                     | 2.8                              | 512               | 128                        | 2*                       | NO                   |
| 13             | 30                | BZ        | 29                       | Positive          | Negative             | 11.6                    | 4                                | 1024              | 256                        | 2                        | NO                   |
| 14             | 30                | NF        | 29                       | Negative          | Negative             | 9.3                     | ND                               | 2048              | ND                         | 1*                       | NO                   |
| 15             | 30                | BZ        | 30                       | ND                | ND                   | 11.4                    | 4                                | 1024              | 64                         | 2                        | NO                   |
| 16             | 30                | BZ        | 30                       | Negative          | Negative             | 12                      | 3.5                              | 512               | 64                         | 1                        | NO                   |
| 17             | 30                | BZ        | 31                       | ND                | ND                   | 11.4                    | 6.1                              | 512               | 256                        | 3                        | NO                   |
| 18             | 30                | NF        | 32                       | Positive          | Negative             | 10.6                    | 6.7                              | 512               | 256                        | 1                        | NO                   |
| 19             | 30                | NF        | 33                       | Positive          | Negative             | 7.1                     | 3.9                              | 256               | 256                        | 1                        | NO                   |
| 20             | 30                | NF        | 33                       | Negative          | Negative             | 11.8                    | 3.1                              | 512               | 256                        | 2                        | NO                   |
| 21             | 30                | NF        | 33                       | Positive          | Negative             | 10                      | 2.7                              | 256               | 256                        | 1**                      | NO                   |
| 22             | 30                | BZ        | 34                       | Positive          | Negative             | 12.1                    | 3.7                              | 2048              | 256                        | 2                        | NO                   |
| 23             | 30                | NF        | 34                       | ND                | ND                   | 6                       | 7.2                              | 512               | 256                        | 1*                       | NO                   |
| 24             | 30                | NF        | 35                       | Negative          | Negative             | 3.1                     | 5.3                              | 128               | 64                         | 1                        | NO                   |
| 25             | 30                | NF        | 39                       | Positive          | Negative             | 6.4                     | 3.1                              | 2048              | 256                        | 1                        | NO                   |
| 26             | 30                | NF        | 40                       | Negative          | Negative             | 8.9                     | 2.1                              | 64                | 16                         | 1**                      | NO                   |
| 27             | 30                | NF        | 42                       | Negative          | Negative             | 11.4                    | 8.3                              | 1024              | 512                        | 1                        | NO                   |

BZ: benznidazole, NF: nifurtimox, ND: not done, R: OD sample/OD cut-off.

\* Has a child infected with *T. cruzi* via the transplacental route prior to treatment.

\*\* Has two children infected with *T. cruzi* via the transplacental route prior to treatment.

<https://doi.org/10.1371/journal.pntd.0011895.t001>

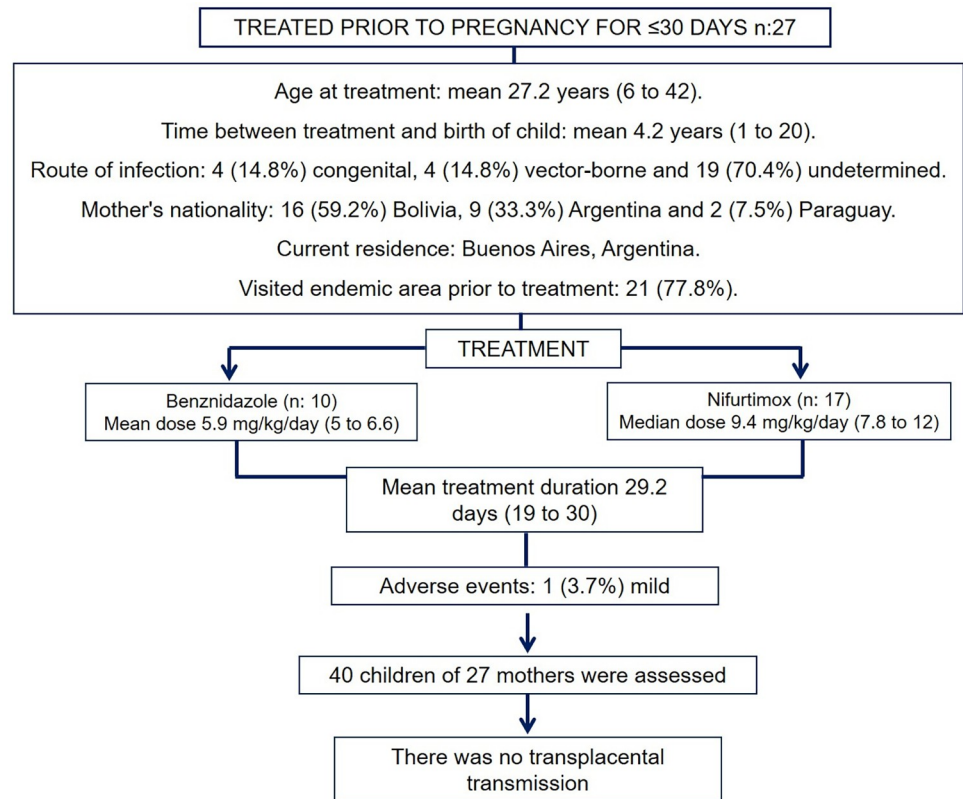

**Fig 1. Sociodemographic, epidemiologic and exposure description of 27 women treated with short treatment with benznidazole or nifurtimox.**

<https://doi.org/10.1371/journal.pntd.0011895.g001>

## Treatment

BZ treatment was prescribed in 10/27 patients (37%), with a mean dose of 5.9 mg/kg/day given twice a day (range: 5 to 6.6 mg/kg/day). NF was prescribed in 17/27 women (63%), with a mean dose of 9.4 mg/kg/day three times a day (range: 7.8 to 12 mg/kg/day). The mean duration was 29.2 days (range: 19 to 30 days). None of the subjects experienced serious adverse events or laboratory abnormalities during the course of treatment. Only one patient (3.7%) reported a mild adverse event, presenting with a rash on the body and extremities.

The mean time between the completion of treatment and the birth of the children was 4.2 years (range: 1 to 20 years).

Median follow-up was 5 years (IQR 25–75 4–8). A progressive reduction was observed for ELISA and IHA. After treatment follow-up, showed a 54.5% decrease in antibody titers measured by ELISA and 86% decreased measured by IHA ( $p < 0.001$ , Wilcoxon test). In 2 patients (7.4%) who received treatment at 6 and 9 years of age, negative seroconversion was observed at 3 years of follow-up (Fig 2).

Pretreatment *T. cruzi* qPCR studies yielded positive results in 13 out of 22 patients (59%). However, after completion of treatment, all patients tested negative, and this negativity persisted throughout the follow-up period ( $p < 0.001$ , Chi-squared test). In addition, women who initially tested negative for qPCR remained negative during the follow-up assessments.

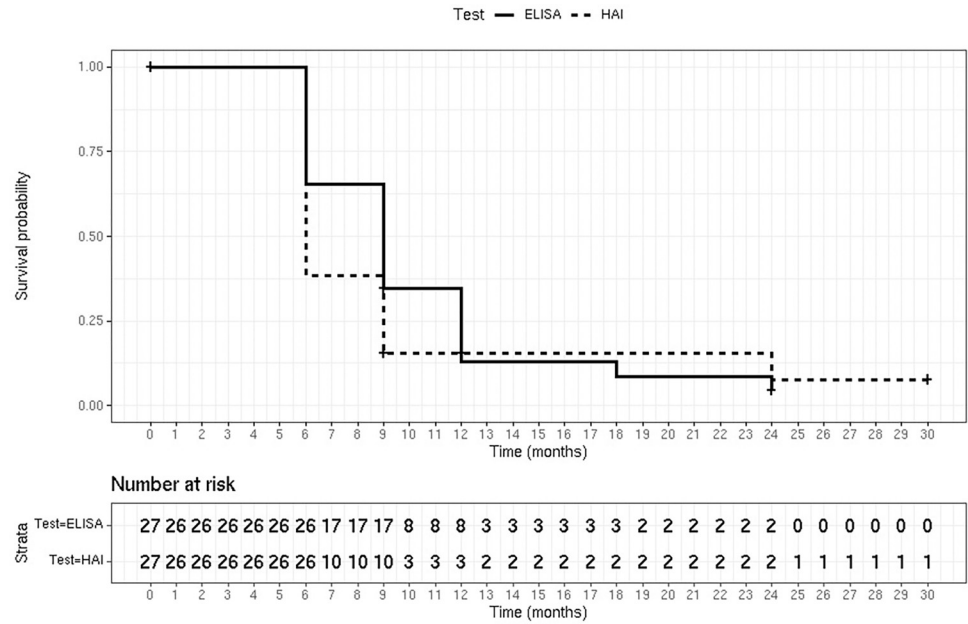

Fig 2. Survival curve time to negative serology.

<https://doi.org/10.1371/journal.pntd.0011895.g002>

**Infants’ outcomes (Table 1)**

A total of 40 newborns from 27 mothers were included in the study. Among them, 7 mothers gave birth to 2 children, and 3 mothers gave birth to 3 children. All newborns were full term and had appropriate weight for their gestational age. No perinatal infectious diseases or complications were observed. Direct parasitemia test (microhematocrit test) performed during the early days of life yielded negative in all cases. qPCR tests were performed in 9 out of 40 infants before 8 months of age, and in all cases, the results were negative. All infants underwent serological evaluations (ELISA and IHA) after reaching 8 months of age. Serology results were negative for all cases, ruling out *T. cruzi* infection.

**Discussion**

A mother with Chagas disease may transmit the infection to subsequent pregnancies, as transplacental transmission can occur during both the acute and chronic phases of the infection. Increased parasitemia during pregnancy, has been described, with a direct relationship between parasitemia levels and transplacental transmission of *T. cruzi* [10].

BZ and NF have been shown to be effective during the acute and early chronic phase of the disease, particularly using 60-day treatment regimens [11–13]. In addition, several studies showed that 60 days treatment of infected girls and women of childbearing age is an effective practice for preventing transplacental transmission of *T. cruzi* [3,4,6], which is currently the main route of transmission in areas without vector transmission or in areas where vector control is only partially effective [2]. The evidence generated by studies on the effectiveness of etiological treatment in girls and women of childbearing age to avoid congenital transmission, has been key for its inclusion in guidelines for diagnosis and treatment for Chagas from both the PAHO as from endemic countries. Furthermore, treatment has the potential to reduce morbidity and mortality caused by cardiac and digestive disorders in these patients [12]. Currently, drug treatment of Chagas disease during pregnancy is not recommended due to the complete lack of data on the fetal safety of available drugs. However, there are reports of pregnant



women with life-threatening acute infection who have been treated without evidence of serious adverse events in both mother and baby, while fetal infection was prevented [14]. We believe that more detailed studies are needed to reinforce this information.

To improve compliance and reduce the risk of adverse events, studies with shorter treatment durations have been proposed. The BENDITA study showed promising results with 30-day regimens in adult patients in the chronic phase [15]. Several studies in adults are currently underway to confirm these results [16,17]. The first prospective clinical trial in children with Chagas disease (the CHICO-SECURE study), comparing 30- and 60-day NF regimens, has recently been published [18]. It showed similar efficacy results with both regimens, especially in children under 2 years of age.

There is limited evidence on the efficacy of short-term ( $\leq 30$  days) treatments with BZ and NF in preventing mother-to-child transmission of *T. cruzi*. In a previously published series by our group, there were 3 women treated for less than 30 days [3], who were included in the current study. Another study reported 5 women who were treated for less than 30 days, with similar results [6].

In our study, none of the children born to women who received treatment  $\leq 30$  days with BZ or NF acquired the infection. This reinforces the benefits of etiological treatment in girls and women of childbearing age for preventing congenital transmission [3–6], even with short course regimens. The importance of short-duration treatments lies in improved compliance and decreased occurrence of adverse events [19]. One limitation of our study is the number of patients included, however there was no transmission of congenital Chagas disease in any case, coinciding with previous reports that used treatment for 60 days. Further studies are necessary in order to confirm these preliminary findings.

Monitoring treatment response is challenging due to the persistence of anti-*T. cruzi* antibodies for many years after treatment. Assessment of therapeutic response is based on the negativization of parasitemia and negative seroconversion or a sero-reduction of more than 20% of anti-*T. cruzi* antibodies detected by conventional serology. This criterion was used in the CHICO-SECURE study that allowed the rescreening in FDA of the pediatric formulation of nifurtimox, and validated in a study of a large cohort of patients treated by our group [13,18,20]. During the follow-up of treated women, we observed an excellent therapeutic response with a significant decrease in antibody titers, exceeding 20% and even achieving seroconversion in two cases with long-term follow-up.

*T. cruzi* parasitaemia assessed by qPCR has been used to monitor treatment response and/or failure in different clinical trials [20–22]. All patients who tested positive for qPCR at baseline had negative parasitemia at the end of treatment and remained negative in repeated studies during the follow-up period.

The sustained decline in antibody titers measured by IHA and ELISA, along with the negative qPCR results, suggest that a short-duration treatment ( $\leq 30$  days) was effective for Chagas disease.

## Conclusion

Previously published data showed the benefits of etiological treatment with 60-day regimens in women of childbearing age to prevent congenital transmission (3,4,5,6). In our study, short-course treatment ( $\leq 30$  days) has demonstrated efficacy and benefits for the prevention of transplacental transmission of Chagas disease. Addressing the prevention of transplacental transmission is of utmost importance, as Chagas disease continues to be a significant public health concern, particularly in Latin America. With millions of women of reproductive age affected by *T. cruzi*, the potential impact of short-duration treatments in preventing transmission to infants is substantial.

## Author Contributions

**Conceptualization:** Guillermo Moscatelli, Samanta Moroni, Nicolás González, Jaime Altcheh.

**Data curation:** Guillermo Moscatelli, Andrés Rabinovich.

**Formal analysis:** Guillermo Moscatelli, Samanta Moroni, Lascano Fernanda, Jaime Altcheh.

**Investigation:** Guillermo Moscatelli, Samanta Moroni, Juan Carlos Ramírez, Belén Warszatska, Lascano Fernanda, Nicolás González, Jaime Altcheh.

**Methodology:** Guillermo Moscatelli, Andrés Rabinovich, Jaime Altcheh.

**Project administration:** Guillermo Moscatelli, Jaime Altcheh.

**Supervision:** Guillermo Moscatelli, Jaime Altcheh.

**Validation:** Guillermo Moscatelli, Nicolás González, Jaime Altcheh.

**Visualization:** Guillermo Moscatelli.

**Writing – original draft:** Guillermo Moscatelli.

**Writing – review & editing:** Guillermo Moscatelli.

## References

1. Moscatelli G, García Bournissen F, Freilij H, Berenstein A, Tarlovsky A, Moroni S, et al. Impact of migration on the occurrence of new cases of Chagas disease in Buenos Aires city, Argentina. *J Infect Dev Ctries*. 2013 Aug 15; 7(8):635–7. <https://doi.org/10.3855/jidc.2930> PMID: 23949300
2. Iniciativa EMTCT PLUS 2011–2021. Esfuerzos para la eliminación de la enfermedad de Chagas congénita en países seleccionados de la Región de las Américas. [<https://www.paho.org/es/documentos/hoja-informativa-iniciativa-emtct-plus-2011-2021-esfuerzos-para-eliminacion-enfermedad>]
3. Moscatelli G, Moroni S, García Bournissen F, Ballering G, Freilij H, Altcheh J. Prevention of congenital Chagas through treatment of girls and women of childbearing age. *Mem Inst Oswaldo Cruz*. 2015 Jun; 110(4):507–9. <https://doi.org/10.1590/0074-02760140347> PMID: 25993401
4. Sosa-Estani S, Cura E, Velazquez E, Yampotis C, Segura EL. Etiological treatment of young women infected with *Trypanosoma cruzi*, and prevention of congenital transmission. *Rev Soc Bras Med Trop*. 2009 Sep-Oct; 42(5):484–7. <https://doi.org/10.1590/s0037-86822009000500002> PMID: 19967227.
5. Murcia L, Carrilero B, Munoz-Davila MJ, Thomas MC, López MC, Segovia M. Risk factors and primary prevention of congenital Chagas disease in a nonendemic country. *Clin Infect Dis*. 2013 Feb; 56(4):496–502. <https://doi.org/10.1093/cid/cis910> Epub 2012 Oct 24. PMID: 23097582.
6. Fabbro DL, Danesi E, Olivera V, Codebó MO, Denner S, Heredia C et al. Trypanocide treatment of women infected with *Trypanosoma cruzi* and its effect on preventing congenital Chagas. *PLoS Negl Trop Dis*. 2014 Nov 20; 8(11):e3312. <https://doi.org/10.1371/journal.pntd.0003312> PMID: 25411847; PMCID: PMC4239005.
7. Pan-American Health Organization. Etiological treatment for Chagas' disease: Conclusions of a technical consultation [in Spanish]. OPS/HCP/HCT/140/99 2008: p. 34, 1999.
8. Organización Panamericana de la Salud. ETMI Plus. Marco para la eliminación de transmisión materno-infantil del VIH, la sífilis, la hepatitis y la enfermedad de Chagas. [<https://www.paho.org/hq/dmdocuments/2017/2017-cha-etmi-plus-marco-vih-hep-chagas.pdf>]. Last accessed february 19, 2023]
9. Ramírez JC, Moreira O. Assessing Parasite Load in Chagas Disease Patients by Quantitative Multiplex Real-Time PCR. *Methods Mol Biol*. 2019; 1955: 215–25. [https://doi.org/10.1007/978-1-4939-9148-8\\_16](https://doi.org/10.1007/978-1-4939-9148-8_16) PMID: 30868530
10. Howard EJ, Xiong X, Carlier Y, Sosa-Estani S, Buekens P. Frequency of the congenital transmission of *Trypanosoma cruzi*: a systematic review and meta-analysis. *BJOG*. 2014 Jan; 121(1):22–33. <https://doi.org/10.1111/1471-0528.12396> PMID: 23924273
11. Freilij H, Altcheh J. Congenital Chagas disease: diagnostic and clinical aspects. *Clin Inf Dis* 1995; 21:551–5. <https://doi.org/10.1093/clinids/21.3.551> PMID: 8527542
12. Viotti R, Vigliano C, Lococo B, Bertocchi G, Petti M, Alvarez MG, et al. Long term cardiac outcomes in treating chronic Chagas disease with benznidazole versus no treatment: a nonrandomized trial. *Ann Intern Med* 2006; 144(10):724–34.



13. Falk N, Berenstein AJ, Moscatelli G, Moroni S, González N, Ballering G, et al. Effectiveness of Nifurtimox in the Treatment of Chagas Disease: A Long-Term Retrospective Cohort Study in Children and Adults. *Antimicrob Agents Chemother*. 2022 May 17; 66(5):e0202121. <https://doi.org/10.1128/aac.02021-21> Epub 2022 Apr 13. PMID: 35416710
14. Bisio M., Altcheh J., Lattner J., Moscatelli G., Fink V., Burgos JM. et al. Benznidazole treatment of chagasic encephalitis in pregnant woman with AIDS. *Emerg Infect Dis*. 2013 Sep; 19(9):1490–2. <https://doi.org/10.3201/eid1909.130667> PMID: 23965334
15. Torrico F, Gascón J, Barreira F, Blum B, Almeida IC, Alonso-Vega C, et al. New regimens of benznidazole monotherapy and in combination with fosravuconazole for treatment of Chagas disease (BEND-ITA): a phase 2, double-blind, randomised trial. *Lancet Infect Dis*. 2021 Aug; 21(8):1129–1140. [https://doi.org/10.1016/S1473-3099\(20\)30844-6](https://doi.org/10.1016/S1473-3099(20)30844-6) Epub 2021 Apr 6. Erratum in: *Lancet Infect Dis*. 2021 Aug;21(8):e208. PMID: 33836161
16. Cafferata ML, Toscani MA, Althabe F, Belizán JM, Bergel E, Berrueta M, et al. Short-course Benznidazole treatment to reduce *Trypanosoma cruzi* parasitic load in women of reproductive age (BETTY): a non-inferiority randomized controlled trial study protocol. *Reprod Health*. 2020 Aug 24; 17(1):128. <https://doi.org/10.1186/s12978-020-00972-1> PMID: 32831069
17. Alonso-Vega C, Urbina JA, Sanz S, Pinazo MJ, Pinto JJ, Gonzalez VR, et al. New chemotherapy regimens and biomarkers for Chagas disease: the rationale and design of the TESEO study, an open-label, randomised, prospective, phase-2 clinical trial in the Plurinational State of Bolivia. *BMJ Open*. 2021 Dec 31; 11(12):e052897. <https://doi.org/10.1136/bmjopen-2021-052897> PMID: 34972765.
18. Altcheh J, Castro L, Dib JC, Grossmann U, Huang E, Moscatelli G, et al. Prospective, historically controlled study to evaluate the efficacy and safety of a new paediatric formulation of nifurtimox in children aged 0 to 17 years with Chagas disease one year after treatment (CHICO). *PLoS Negl Trop Dis*. 2021 Jan 7; 15(1):e0008912. <https://doi.org/10.1371/journal.pntd.0008912> PMID: 33412557
19. Altcheh J, Moscatelli G, Moroni S, García-Bournissen F, Freilij H. Adverse Events After the Use of Benznidazole in Infants and Children With Chagas disease. *Pediatrics*. 2011 Jan; 127(1):e212–8. <https://doi.org/10.1542/peds.2010-1172> PMID: 21173000
20. Moscatelli G, Moroni S, García Bournissen F, González N, Ballering G, et al. Longitudinal follow up of serological response in children treated for Chagas disease. *PLoS Negl Trop Dis*, 2019, 13(8): e0007668. <https://doi.org/10.1371/journal.pntd.0007668> PMID: 31465522
21. Schijman AG, Altcheh J, Burgos JM, Biancardi M, Bisio M, Levin MJ, et al. Aetiological treatment of congenital Chagas' disease diagnosed and monitored by the polymerase chain reaction. *J Antimicrob Chemother*. 2003; 52(3):441–449. <https://doi.org/10.1093/jac/dkg338> PMID: 12917253
22. Bisio M, Rivero R, Gonzalez N, Ballering G, D'Amico I, Kessler Cet al. Diagnostic Accuracy of Two Molecular Tools for Diagnosis of Congenital Chagas Disease. *Mol Diagn Ther*. 2021 Nov; 25(6):791–801. <https://doi.org/10.1007/s40291-021-00553-3> Epub 2021 Aug 23. PMID: 34426953
